**Corrigendum: *Water Practice and Technology* 14 (1), 229–239: Phycocyanin as a proxy for algal blooms in surface waters: case study of Ukerewe Island, Tanzania, Geoffrey J. Mchau, Edna Makule, Revocatus Machunda, Yun Yun Gong and Martin Kimanya**

The authors regret that there were some errors in the text. The corrected text is given below.

---

**INTRODUCTION**

Page 229, Second paragraph should be shown as:

Toxins can be classified on the basis of the symptoms produced in humans and other vertebrates – e.g., hepatotoxins, neurotoxins and irritant-dermal toxins. The hepatotoxins include the microcystin (MC) toxins such as MC-LR, MC-RR and MC-YR, which have high potential for contaminating drinking water (Carmichael *et al.* 2001).
